# Supplementary material
Source: PubMed Central journal article supplement (PMC9387483)

# Knockdown post-exposure

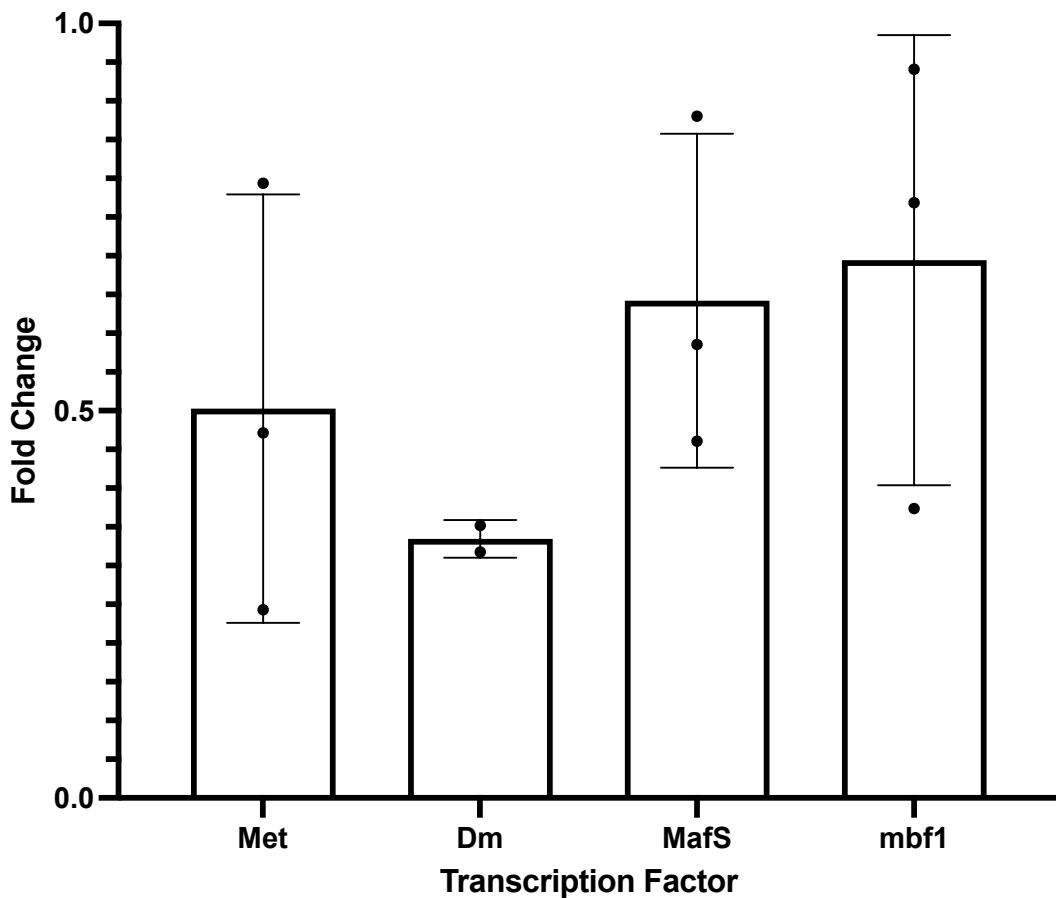

Supplement: mmc3.pdf [file mmc3.pdf]
