# Supplementary material
Source: PubMed Central journal article supplement (PMC9387483)

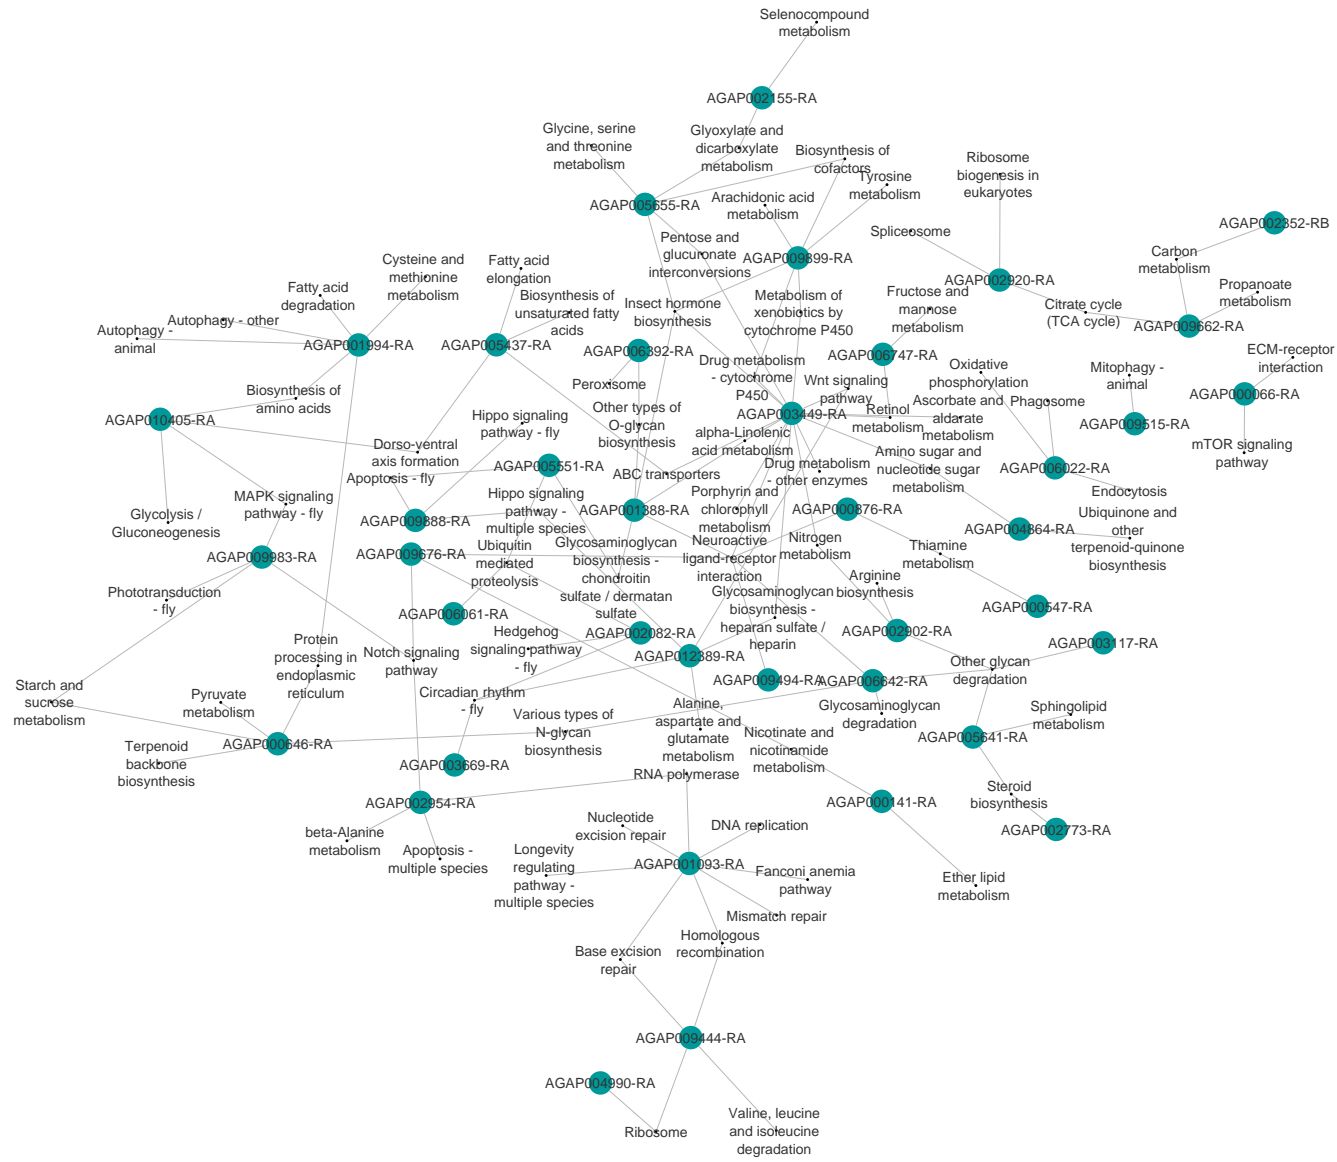

Supplement: mmc5.pdf [file mmc5.pdf]
