# Supplementary material
Source: PubMed Central journal article supplement (PMC9387483)

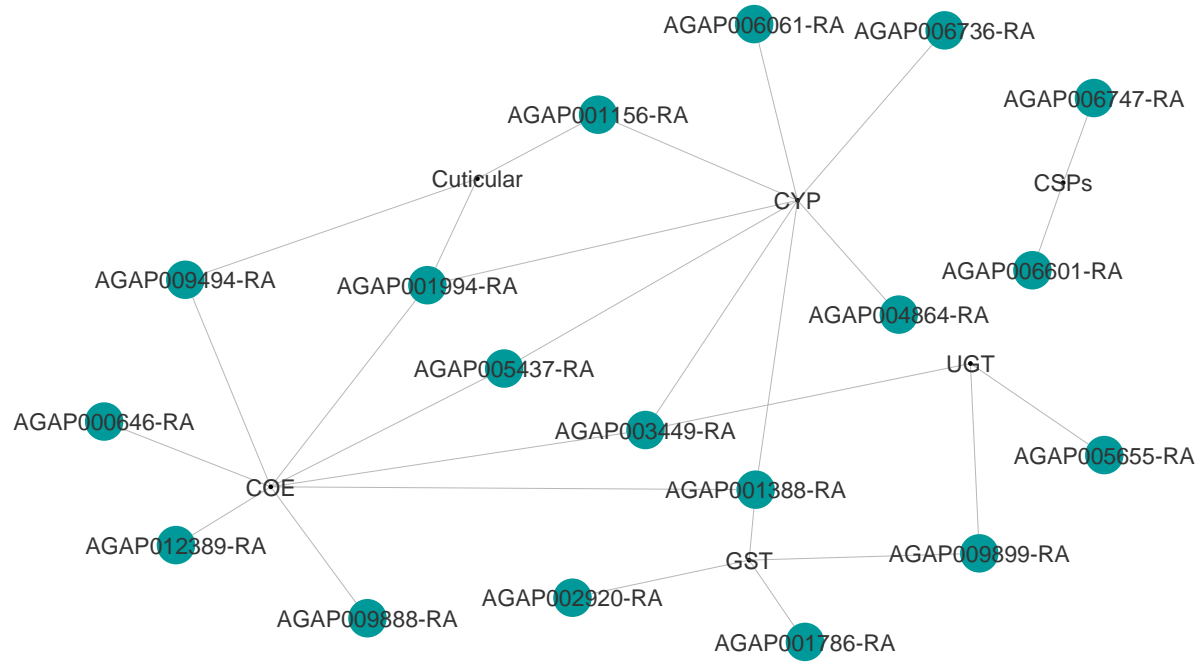

Supplement: mmc6.pdf [file mmc6.pdf]
